# Supplementary material for: Synthesis and magnetochemistry of heterometallic triangular FeIII2LnIII (Ln = La, Gd, Tb, Dy, and Ho) and FeIII2YIII complexes
Source: Royal Society of Chemistry journal article supplement (doi:10.1039/c7dt00949f), 2017-01-01
Supplement: c7dt00949f1.pdf [file c7dt00949f1.pdf]

# Synthesis and Magnetochemistry of Heterometallic Triangular Fe<sup>III</sup><sub>2</sub>Ln<sup>III</sup> (Ln = La, Gd, Tb, Dy, and Ho) and Fe<sup>III</sup><sub>2</sub>Y<sup>III</sup> Complexes

Namrata Singh<sup>a</sup>, Sayak Das Gupta<sup>b</sup>, Raymond J. Butcher<sup>c</sup>, and George Christou<sup>b</sup>

<sup>a</sup> Department of Chemistry, Indian Institute of Technology Kanpur, Kanpur-208016, U.P., India.

<sup>b</sup> Department of Chemistry, University of Florida, Gainesville, Florida 32611-7200, United States.

<sup>c</sup> Department of Chemistry, Howard University, Washington, D.C. 20059, United States.

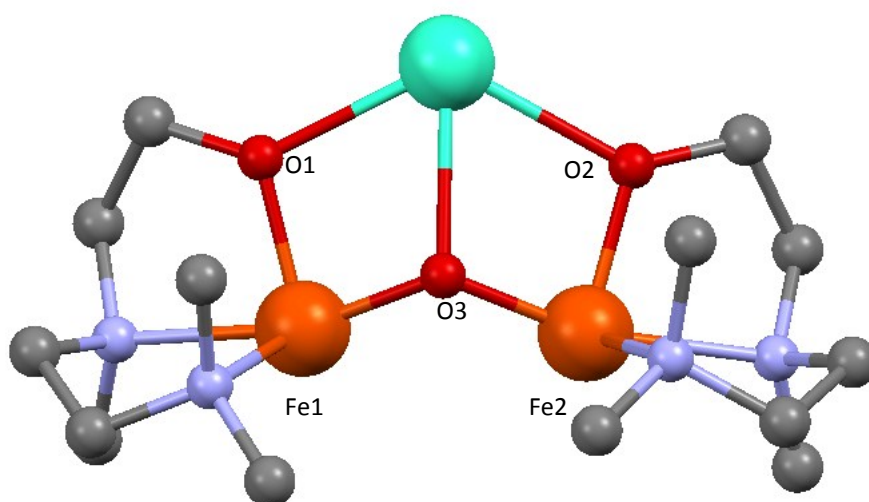

Figure S1. Structure of Fe<sub>2</sub>LnO core. Ln<sup>III</sup> green, Fe<sup>III</sup> orange, N blue, O, red and C grey.

Table S1. Some important bond distances in Angstroms (Å)

| Ln        | Ln-O1/O2    | Ln-O3 | Ln-Fe1/Fe2  | Fe1-O1 | Fe2-O2 | Fe1/Fe2-O3  | Fe1-Fe2 |
|-----------|-------------|-------|-------------|--------|--------|-------------|---------|
| <b>La</b> | 2.499/2.475 | 2.534 | 3.483/3.471 | 1.950  | 1.965  | 1.837/1.836 | 3.191   |
| <b>Gd</b> | 2.408/2.377 | 2.446 | 3.412/3.401 | 1.956  | 1.964  | 1.834/1.838 | 3.188   |
| <b>Tb</b> | 2.348/2.385 | 2.432 | 3.381/3.398 | 1.965  | 1.949  | 1.828/1.832 | 3.174   |
| <b>Dy</b> | 2.376/2.338 | 2.416 | 3.389/3.376 | 1.941  | 1.965  | 1.836/1.832 | 3.177   |
| <b>Ho</b> | 2.376/2.340 | 2.412 | 3.390/3.374 | 1.949  | 1.967  | 1.836/1.830 | 3.177   |
| <b>Y</b>  | 2.334/2.364 | 2.402 | 3.366/3.377 | 1.966  | 1.947  | 1.825/1.830 | 3.168   |

Table S2. Some important bond angles in degrees (°)

| Ln        | Ln-Fe1-Ln | Ln-Fe2-Ln | Ln-O3-Fe1 | Ln-O3-Fe2 |
|-----------|-----------|-----------|-----------|-----------|
| <b>La</b> | 62.50     | 62.87     | 104.52    | 104.02    |
| <b>Gd</b> | 61.92     | 62.29     | 104.81    | 104.19    |
| <b>Tb</b> | 62.35     | 61.81     | 104.13    | 104.78    |
| <b>Dy</b> | 61.77     | 62.20     | 104.89    | 104.40    |
| <b>Ho</b> | 61.73     | 62.24     | 104.50    | 104.52    |
| <b>Y</b>  | 62.14     | 61.81     | 104.74    | 105.07    |

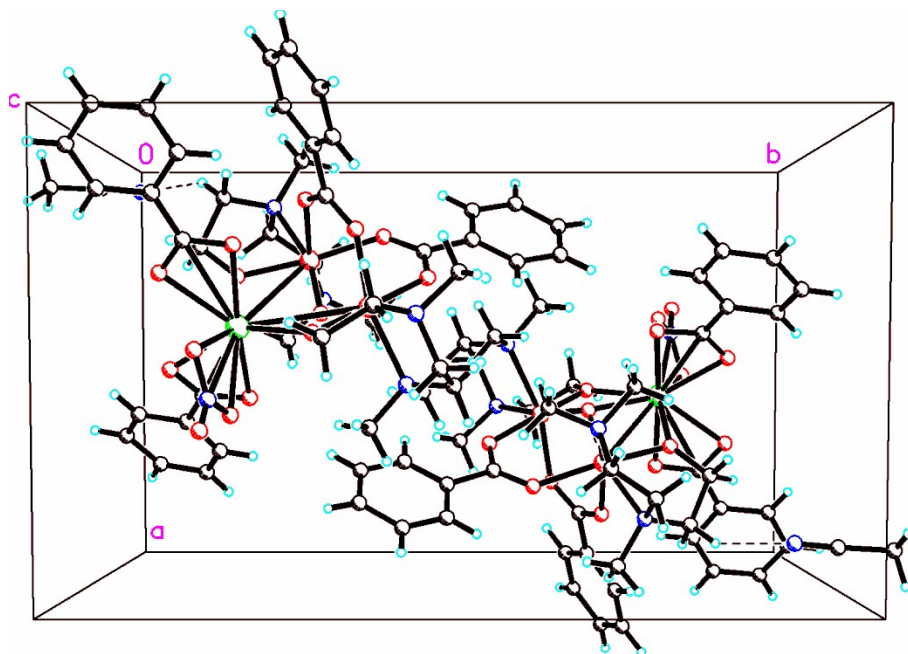

Figure S2. Molecular packing in unit cell.

Table S3. N---H bond distance in Angstroms (Å). (Hydrogen bond between acetonitrile 'N' and dmem CH<sub>2</sub>)

| Ln | N---H bond distance |
|----|---------------------|
| La | 3.816               |
| Gd | 3.788               |
| Tb | 3.807               |
| Dy | 3.833               |
| Ho | 3.842               |
| Y  | 3.841               |

Table S4. Coupling constant (*J*) values for Fe cluster with structural parameters.

| S. No. | Molecular Formula                                                                                                                           | Fe-μ-O (Å)            | Fe-μ-O-Fe (°) | <i>J</i> (cm <sup>-1</sup> ) | Ref |
|--------|---------------------------------------------------------------------------------------------------------------------------------------------|-----------------------|---------------|------------------------------|-----|
| 1      | [Fe <sub>3</sub> O(O <sub>2</sub> CBu <sup>t</sup> ) <sub>2</sub> (N <sub>3</sub> ) <sub>3</sub> (dmem) <sub>2</sub> ]                      | 1.8716(19)/1.8647(19) | 162.82(11)    | -45.9                        | 1   |
| 2      | [Fe <sub>2</sub> CaO(O <sub>2</sub> CCl <sub>3</sub> ) <sub>6</sub> (THF) <sub>4</sub> ].THF                                                | 1.827(1)              | 124.09        | -58.9                        | 2   |
| 3      | [Fe <sub>2</sub> SrO(O <sub>2</sub> CCl <sub>3</sub> ) <sub>6</sub> (THF) <sub>6</sub> ].0.5THF                                             | --                    | --            | -75.4                        | 2   |
| 4      | [Fe <sub>2</sub> BaO(O <sub>2</sub> CCl <sub>3</sub> ) <sub>6</sub> (THF) <sub>6</sub> ].0.5THF.0.5H <sub>2</sub> O                         | 1.816(3)              | 123.55        | -60.40                       | 2   |
| 5      | [Fe <sub>3</sub> O(TIEO) <sub>2</sub> (O <sub>2</sub> CPh) <sub>2</sub> Cl <sub>3</sub> ] (Isosceles)                                       | 1.862(7)/1.867(7)     | 159.1(3)      | -55.0(6)                     | 3   |
| 6      | [Fe <sub>2</sub> Gd <sub>2</sub> O(OH)(TBC[4]) <sub>2</sub> (dmf) <sub>4</sub> (MeOH) <sub>2</sub> (H <sub>2</sub> O) <sub>2</sub> ]Cl      | 1.87                  | 144.7         | -85.0                        | 4   |
| 7      | [Fe <sub>2</sub> MgO(O <sub>2</sub> CCH <sub>3</sub> ) <sub>6</sub> (Py) <sub>3</sub> ]                                                     | 1.890(3)              | 120           | -62(3)                       | 5   |
| 8      | [Fe <sub>2</sub> MnO(O <sub>2</sub> CCH <sub>3</sub> ) <sub>6</sub> (Py) <sub>3</sub> ]                                                     | 1.867(2)/1.862(2)     | 122.85        | -64(3)                       | 5   |
| 9      | [Fe <sub>2</sub> NiO(O <sub>2</sub> CCH <sub>3</sub> ) <sub>6</sub> (Py) <sub>3</sub> ]                                                     | --                    | --            | -73(3)                       | 5   |
| 10     | [Fe <sub>2</sub> NiO(O <sub>2</sub> CCH <sub>3</sub> ) <sub>6</sub> (H <sub>2</sub> O) <sub>3</sub> ]                                       | 1.875/1.891           | 119.8         | -71(3)                       | 5   |
| 11     | [Fe <sub>3</sub> Gd(μ <sub>3</sub> -O) <sub>2</sub> (CCl <sub>3</sub> CO <sub>2</sub> ) <sub>8</sub> (H <sub>2</sub> O)(THF) <sub>3</sub> ] | ~1.8                  | ~125          | -35                          | 6   |
| 12     | [Fe <sub>3</sub> Y(μ <sub>3</sub> -O) <sub>2</sub> (CCl <sub>3</sub> CO <sub>2</sub> ) <sub>8</sub> (H <sub>2</sub> O)(THF) <sub>3</sub> ]  | ~1.8                  | ~125          | -35                          | 6   |
| 13     | [Fe <sub>3</sub> Lu(μ <sub>3</sub> -O) <sub>2</sub> (CCl <sub>3</sub> CO <sub>2</sub> ) <sub>8</sub> (H <sub>2</sub> O)(THF) <sub>3</sub> ] | ~1.8                  | ~125          | -35                          | 6   |
| 14     | [Fe <sub>3</sub> O(Etsao)(benz) <sub>5</sub> (MeOH) <sub>2</sub> ]                                                                          | 1.887                 | 120.65        | -38                          | 7   |
| 15     | [Fe <sub>3</sub> O(Etsao)(benz) <sub>5</sub> (MeOH) <sub>2</sub> ]                                                                          | 1.905                 | 122.65        | -29.3                        | 7   |

#### References:

1. Inorg. Chem., 2007, 46, 4535.
2. Polyhed., 2006, 25, 175.
3. J. Am. Chem. Soc., 1985, 107, 4568 and J. Am. Chem. Soc., 1987, 109, 4244.

4. Chem. Commun., 2011, 47, 9042.
5. J. Chem. Soc. Dalton Trans., 1985, 2509.
6. Phys. Rev. B 2009, 80, 14430.
7. Dalton Trans., 2008, 2043.
